# Supplementary material for: Biologically Relevant Micellar Nanocarrier Systems for Drug Encapsulation and Functionalization of Metallic Nanoparticles
Source: Nanomaterials (Basel). 2022 May 20;12(10):1753. doi: 10.3390/nano12101753 (PMC9145561; doi:10.3390/nano12101753)
Supplement: Supplementary file 1 [file nanomaterials-12-01753-s001.zip › nanomaterials-1720112-supplementary.pdf]

# Biologically Relevant Micellar Nanocarrier Systems for Drug Encapsulation and Functionalization of Metallic Nanoparticles

Victoria Valdivia <sup>1,\*</sup>, Raúl Gimeno-Ferrero <sup>1</sup>, Manuel Pernia Leal <sup>1,\*</sup>, Chiara Paggiaro <sup>1</sup>,  
Ana María Fernández-Romero <sup>2</sup>, María Luisa González-Rodríguez <sup>2</sup> and Inmaculada Fernández <sup>1,\*</sup>

<sup>1</sup> Departamento de Química Orgánica y Farmacéutica, Facultad de Farmacia, Universidad de Sevilla, 41012 Seville, Spain; rgimeno@us.es (R.G.-F.); chiara.paggiaro@studenti.units.it (C.P.)

<sup>2</sup> Departamento de Farmacia y Tecnología Farmacéutica, Facultad de Farmacia, Universidad de Sevilla, 41012 Seville, Spain; anaferrom2@alum.us.es (A.M.F.-R.); malugoro@us.es (M.L.G.-R.)

\* Correspondence: vvaldivia@us.es (V.V.); mpernia@us.es (M.P.L.); inmaff@us.es (I.F.)

## Synthesis of Surfactants

### Synthesis of Compound 3

#### Compound 2

A solution 0.5 M of propargylamine (1 equivalent) and dimethylaminopyridine (0.2 equivalent) in dry CH<sub>2</sub>Cl<sub>2</sub> was added to a solution of 0.5 M of oleic acid (0.8 equivalent) and diisopropylcarbodiimide (1.1 equivalent) in dry CH<sub>2</sub>Cl<sub>2</sub>. The reaction mixture was stirred under argon atmosphere overnight. The reaction was diluted with CH<sub>2</sub>Cl<sub>2</sub>, and the organic layer was washed with HCl 1M (2 × 10 mL), saturated NaHCO<sub>3</sub> aqueous solution (10 mL), and brine (10 mL). The organic layer was dried over anhydrous Na<sub>2</sub>SO<sub>4</sub>. The solvent was removed, and the crude product was chromatographed (EtOAc: Hexane, 1:5) to yield a white solid **2** (57% purity).

**R<sub>f</sub>** (Hexane/EtOAc 3:1): 0.55

<sup>1</sup>H NMR (500 MHz, CDCl<sub>3</sub>): δ 5.6 (bs, 1H), 5.39–5.35 (m, 2H), 4.1 (m, 2H), 2.25–2.235 (m, 1H), 2.22–2.19 (m, 2H), 2.05–2.01 (m, 4H), 1.67–1.64 (m, 2H), 1.33–1.29 (m, 20H), 0.9 (t, 3H, *J* = 7 Hz).

<sup>13</sup>C NMR (125.7 MHz, CDCl<sub>3</sub>): δ 170.4, 155.7, 80.0, 70.7, 70.7, 70.6, 70.0, 68.9, 64.4, 60.3, 53.4, 50.7, 42.4, 28.3.

**HRMS calc. for C<sub>21</sub>H<sub>37</sub>NONa [M+Na]<sup>+</sup>**: 342.2753, found 342.2767.

#### Compound 3

A solution of 1 M of N<sub>3</sub>-TEG-NH<sub>2</sub> (1 equivalent) and **2** (1 equivalent) in CH<sub>2</sub>Cl<sub>2</sub> was added to a solution of CuSO<sub>4</sub> (0.15 equivalent) and sodium ascorbate (0.45 equivalent) in water. The mixture was stirred at room temperature for 3 days. Next, the organic layer was separated and dried over anhydrous Na<sub>2</sub>SO<sub>4</sub>, and the CH<sub>2</sub>Cl<sub>2</sub> was evaporated. The crude product was chromatographed (CH<sub>2</sub>Cl<sub>2</sub>: MeOH, 9:1) to yield a white solid **3** (30% purity).

**R<sub>f</sub>** (CH<sub>2</sub>Cl<sub>2</sub>/MeOH 9:1): 0.08

<sup>1</sup>H NMR (500 MHz, MeOD): δ 7.8 (s, 1H), 5.39–5.23 (m, 2H), 4.47 (t, *J* = 6, 2H), 4.2 (s, 2H), 3.8 (t, *J* = 5 Hz, 2H), 3.61–3.60 (m, 2H), 3.55–3.50 (m, 8H), 3.0 (s, 2H), 2.12 (t, *J* = 7.5 Hz, 2H), 1.93–1.92 (m, 4H), 1.79–1.73 (m, 2H), 1.51 (m, 2H), 1.22–1.19 (m, 20H), 0.80 (t, *J* = 7 Hz, 3H).

<sup>13</sup>C NMR (125.7 MHz, MeOD): δ 176.2, 130.9, 130.8, 124.9, 71.5, 71.4, 71.3, 71.2, 70.4, 68.2, 51.4, 37.0, 35.5, 33.0, 30.8, 30.5, 30.4, 30.3, 30.3, 30.3, 30.2, 28.1, 28.1, 26.9, 23.7, 14.4.

**HRMS calc. for C<sub>29</sub>H<sub>55</sub>N<sub>5</sub>O<sub>4</sub> [M+H]<sup>+</sup>**: 538.43; found 538.43.

**Citation:** Valdivia, V.; Gimeno-Ferrero, R.; Pernia Leal, M.; Paggiaro, C.; Fernández-Romero, A.M.; González-Rodríguez, M.L.; Fernández, I. Biologically Relevant Micellar Nanocarrier Systems for Drug Encapsulation and Functionalization of Metallic Nanoparticles. *Nanomaterials* **2022**, *12*, 1753. <https://doi.org/10.3390/nano12101753>

Academic Editor: Stefano Leporatti

Received: 25 April 2022

Accepted: 17 May 2022

Published: 20 May 2022

**Publisher's Note:** MDPI stays neutral with regard to jurisdictional claims in published maps and institutional affiliations.

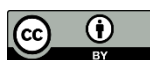

**Copyright:** © 2022 by the authors. Licensee MDPI, Basel, Switzerland. This article is an open access article distributed under the terms and conditions of the Creative Commons Attribution (CC BY) license (<https://creativecommons.org/licenses/by/4.0/>).

*Synthesis of Compounds 4 and 5***Compound 4**

A solution of 1 M of N<sub>3</sub>-TEG-NH<sub>2</sub> (1 equivalent) in dry CH<sub>2</sub>Cl<sub>2</sub> under argon atmosphere was added to a solution of Et<sub>3</sub>N (1.1 equivalent) and oleoyl chloride (1 equivalent) at room temperature for 24 h. The reaction was diluted with CH<sub>2</sub>Cl<sub>2</sub>, and the organic layer was washed with HCl 1M (3 × 5 mL), saturated NaHCO<sub>3</sub> aqueous solution (5 mL), and brine (10 mL). The organic layer was dried over anhydrous Na<sub>2</sub>SO<sub>4</sub>. The solvent was removed, and the crude product was chromatographed (CH<sub>2</sub>Cl<sub>2</sub>: MeOH, 15:1) to yield a white solid **4** (57% purity).

**R<sub>f</sub>** (CH<sub>2</sub>Cl<sub>2</sub>/MeOH 9:1): 0.60.

**<sup>1</sup>H NMR (500 MHz, CDCl<sub>3</sub>):** δ 6.0 (s, 1H), 5.35–5.33 (m, 2H), 3.69–3.60 (m, 10H), 3.5 (t, *J* = 5 Hz, 2H), 3.47–3.45 (m, 2H), 3.39 (t, *J* = 5 Hz, 2H), 2.17 (t, *J* = 7.5 Hz, 2H), 2.02–1.98 (m, 4H), 1.64–1.61 (m, 2H), 1.30–1.25 (m, 20H), 0.89 (t, *J* = 6.5 Hz, 3H).

**<sup>13</sup>C NMR (125.7 MHz, CDCl<sub>3</sub>):** δ 173.4, 130.1, 129.9, 70.9, 70.8, 70.7, 70.4, 70.2, 70.1, 50.8, 39.3, 36.9, 32.0, 29.9, 29.9, 29.8, 29.7, 29.5, 29.3, 27.4, 27.3, 25.9, 22.8, 14.2.

**HRMS calc. for C<sub>26</sub>H<sub>50</sub>N<sub>4</sub>O<sub>4</sub>Na [M+Na]<sup>+</sup>:** 505.3724; found 505.3718

**Compound 5**

To a solution 0.2 M of the azide **4** (1 equivalent) in dry THF was added at 0°C a 1 M LAH solution in THF under argon atmosphere. After 1 h, the reaction mixture was quenched with saturated Na<sub>2</sub>SO<sub>4</sub> aqueous solution, and it was stirred for 30 min at room temperature. The mixture was filtered over celite and washed with ether (5 × 10 mL) and then with CH<sub>2</sub>Cl<sub>2</sub> (10 mL). The combined organic phases were dried over anhydrous Na<sub>2</sub>SO<sub>4</sub>, filtered and concentrated. The crude product was chromatographed (CH<sub>2</sub>Cl<sub>2</sub>: MeOH, 15:1) to yield a colorless oil **5** (65% purity)

**R<sub>f</sub>** (CH<sub>2</sub>Cl<sub>2</sub>/MeOH 15:1) = 0.1

**<sup>1</sup>H NMR (500 MHz, CDCl<sub>3</sub>):** δ 6.6 (s, 1H), 5.35–5.32 (m, 2H), 3.65–3.56 (m, 10H), 3.48–3.44 (m, 2H), 3.04–3.03 (m, 2H), 2.98–2.96 (m, 2H), 2.94–2.92 (m, 2H), 2.20–2.17 (m, 2H), 2.02–1.98 (m, 4H), 1.63–1.60 (m, 2H), 1.30–1.27 (m, 20H), 0.88 (t, *J* = 7 Hz, 3H).

**<sup>13</sup>C NMR (125.7 MHz, CDCl<sub>3</sub>):** δ 173.7, 130.1, 129.9, 70.6, 70.5, 70.3, 70.2, 39.3, 36.8, 32.0, 29.9, 29.9, 29.8, 29.81, 29.7, 29.5, 29.4, 29.3, 27.4, 27.3, 25.9, 22.8, 14.2.

**HRMS calc. for C<sub>26</sub>H<sub>52</sub>N<sub>2</sub>O<sub>4</sub> [M+H]<sup>+</sup>:** 457.71; found 457.40

### NMR Spectra

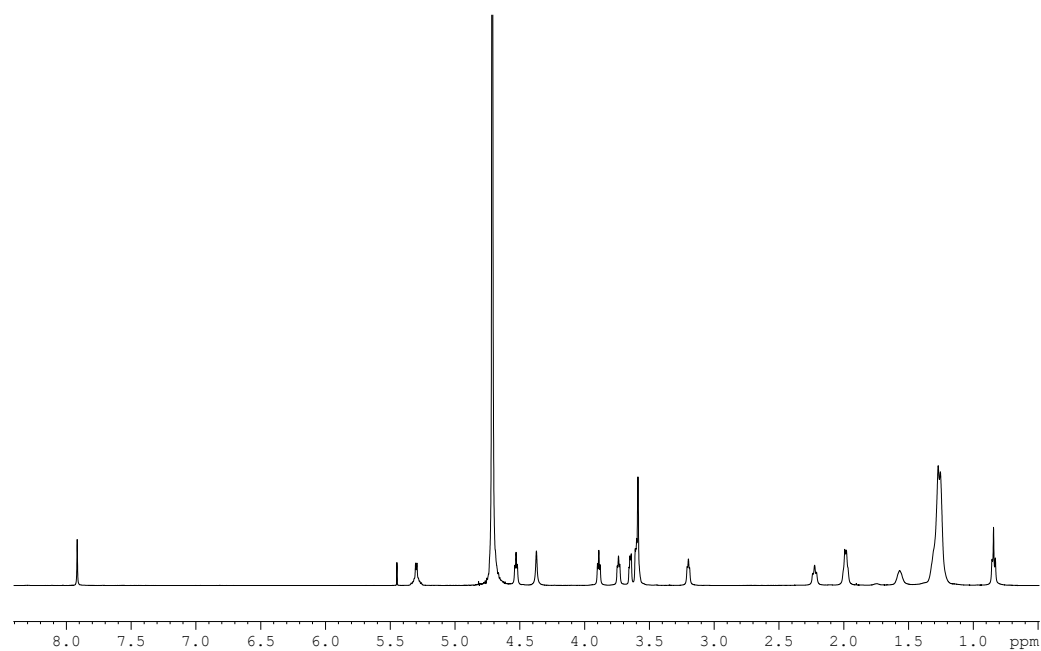

Figure S1.  $^1\text{H}$ -NMR of 3 in  $\text{D}_2\text{O}$ .

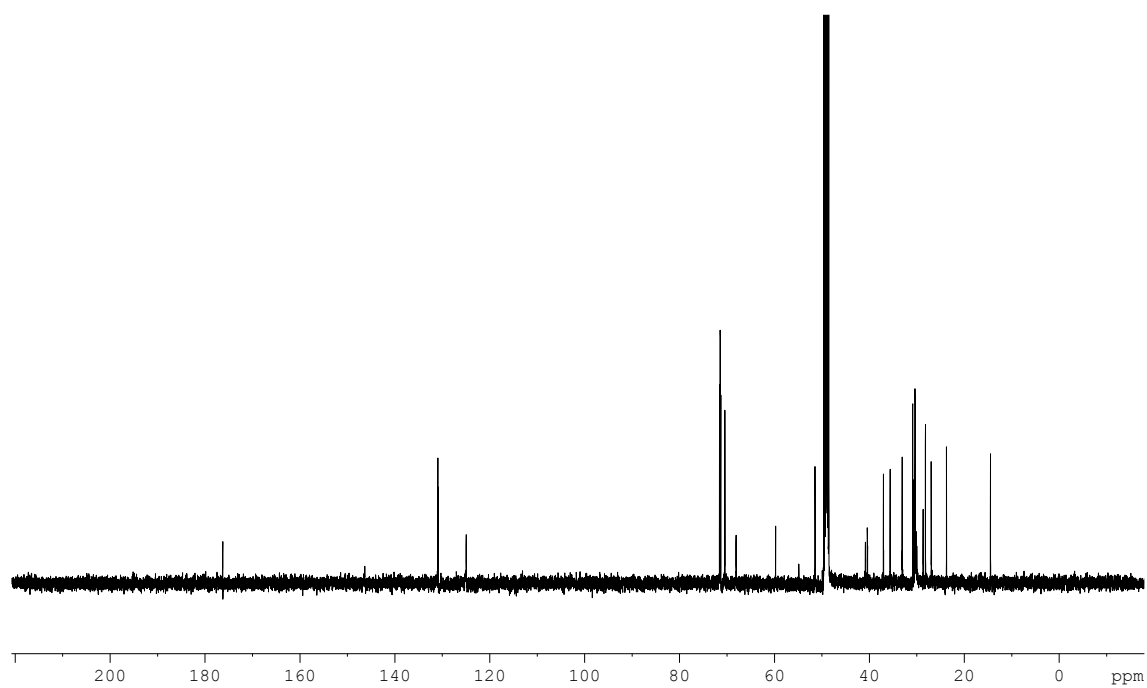

Figure S2.  $^{13}\text{C}$ -NMR of 3 in MeOD.

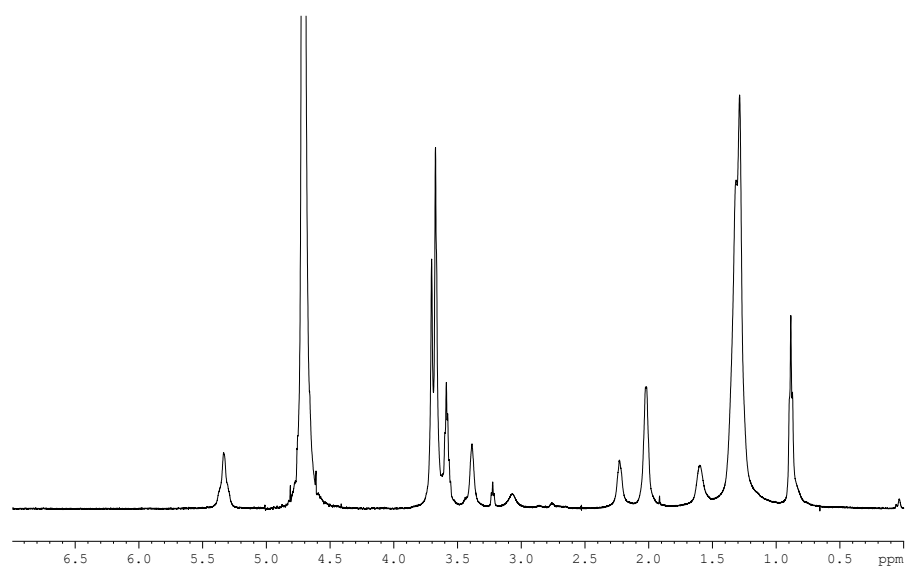

**Figure S3.**  $^1\text{H}$ -NMR of 5 in  $\text{D}_2\text{O}$ .

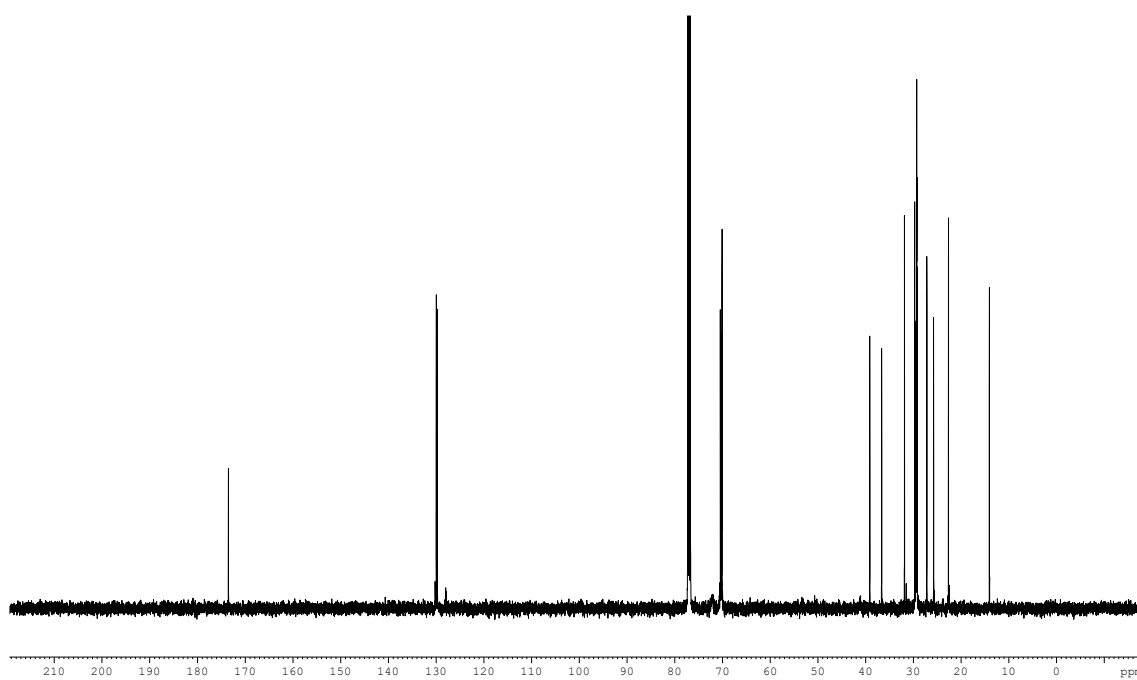

**Figure S4.**  $^{13}\text{C}$ -NMR of 5 in MeOD.

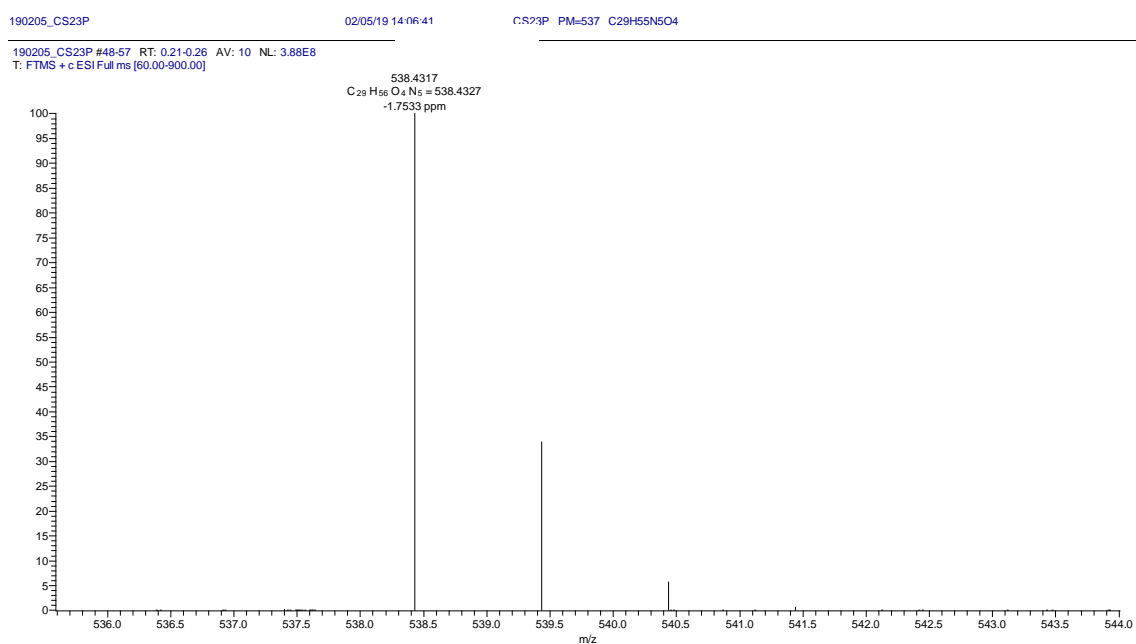

Figure S5. HRMS Spectrum of 3.

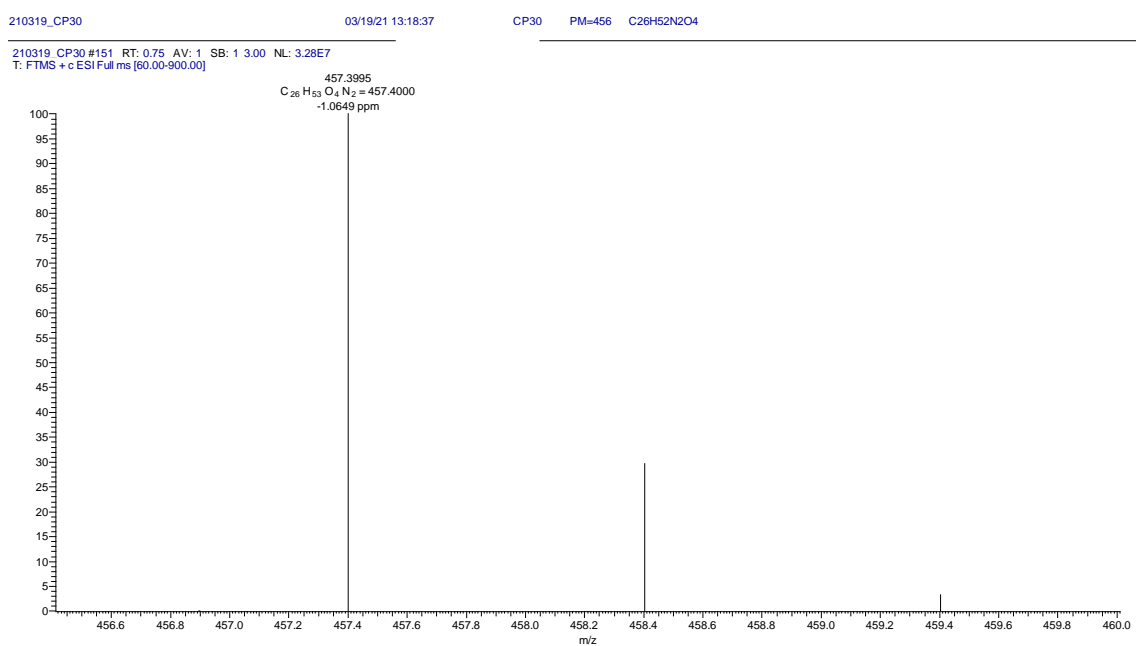

Figure S6. HRMS Spectrum of 5.

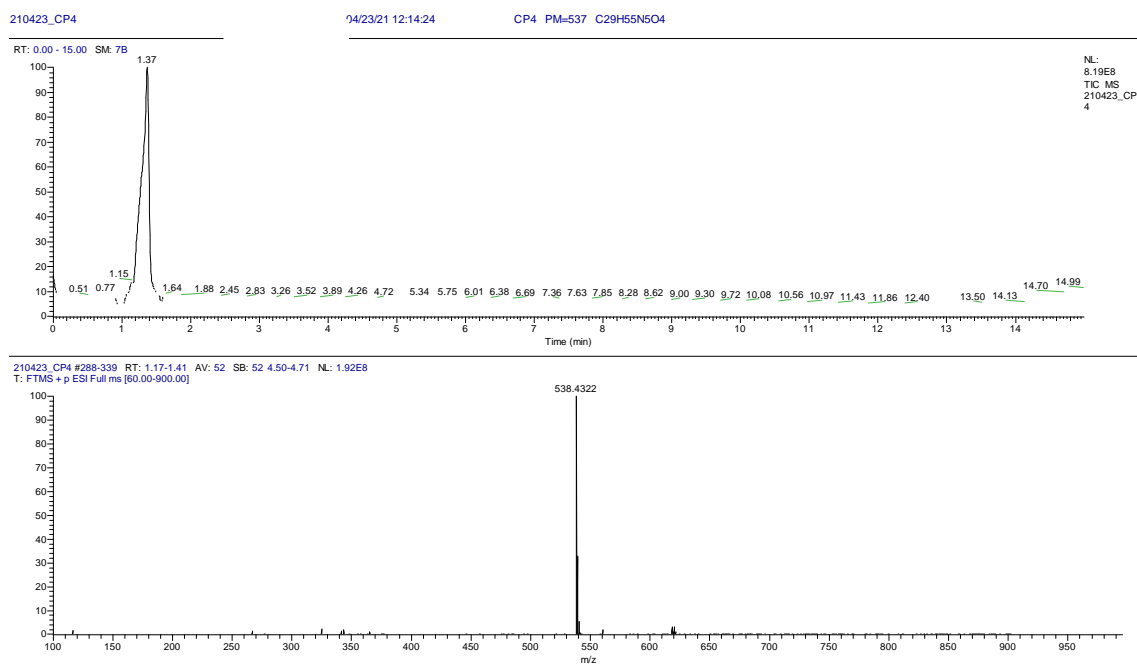

**Figure S7.** Top graph corresponds to HPLC chromatogram of 3. Bottom graph corresponds to MS Spectrum of 3.

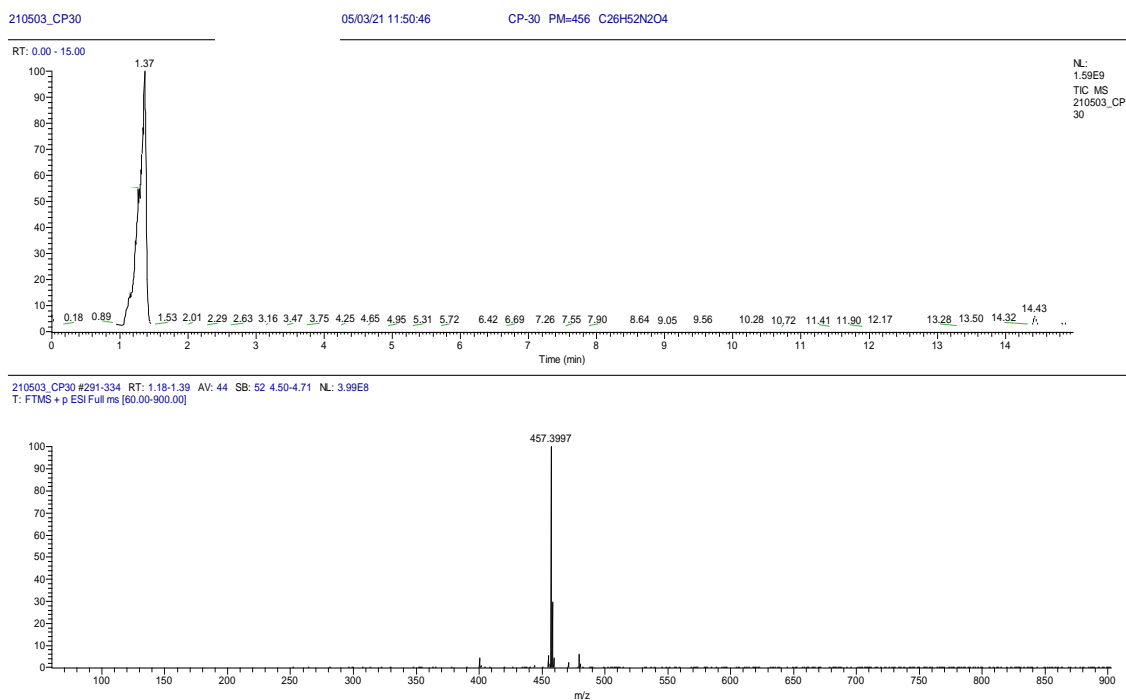

**Figure S8.** Top graph corresponds to HPLC chromatogram of 5. Bottom graph corresponds to MS Spectrum of 5.

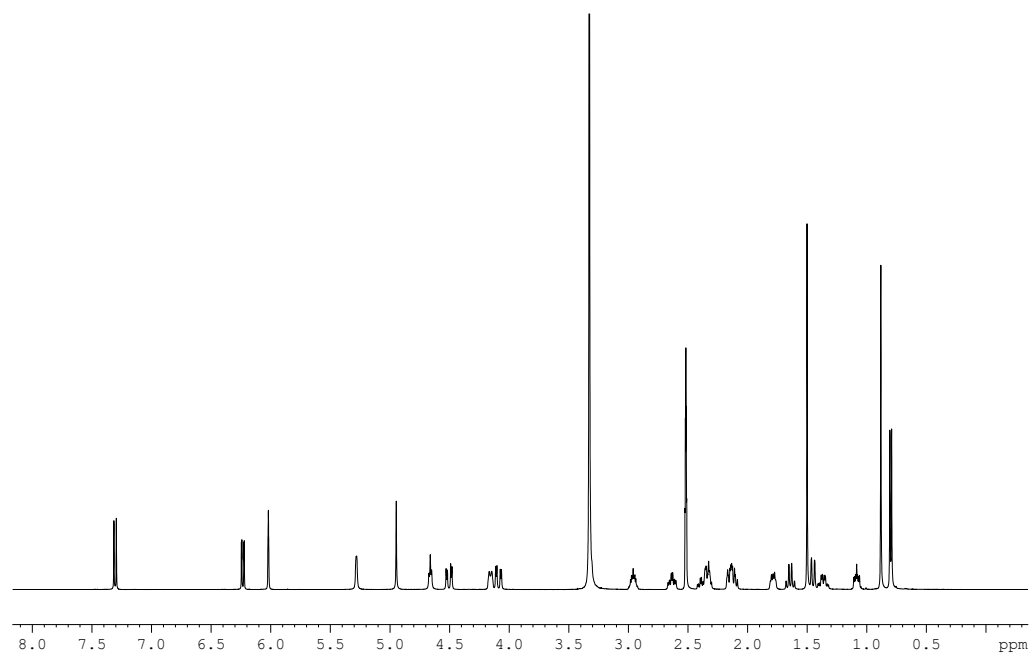

**Figure S9.**  $^1\text{H}$ -NMR of dexamethasone in  $\text{DMSO-d}_6$ .

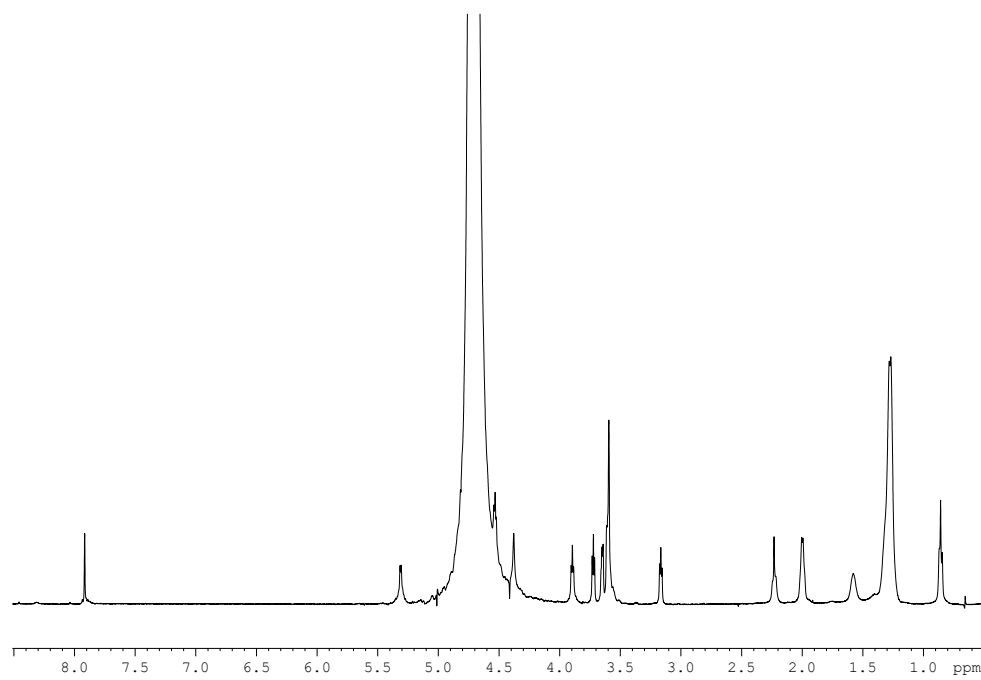

**Figure S10.**  $^1\text{H}$ -NMR of M3 in  $\text{D}_2\text{O}$ .

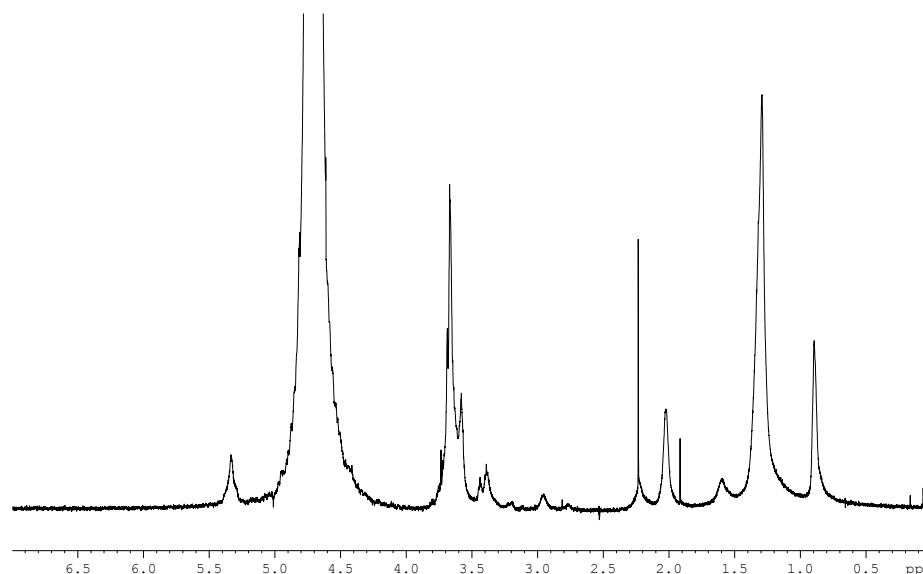

Figure S11.  $^1\text{H}$ -NMR of M5 in  $\text{D}_2\text{O}$ .

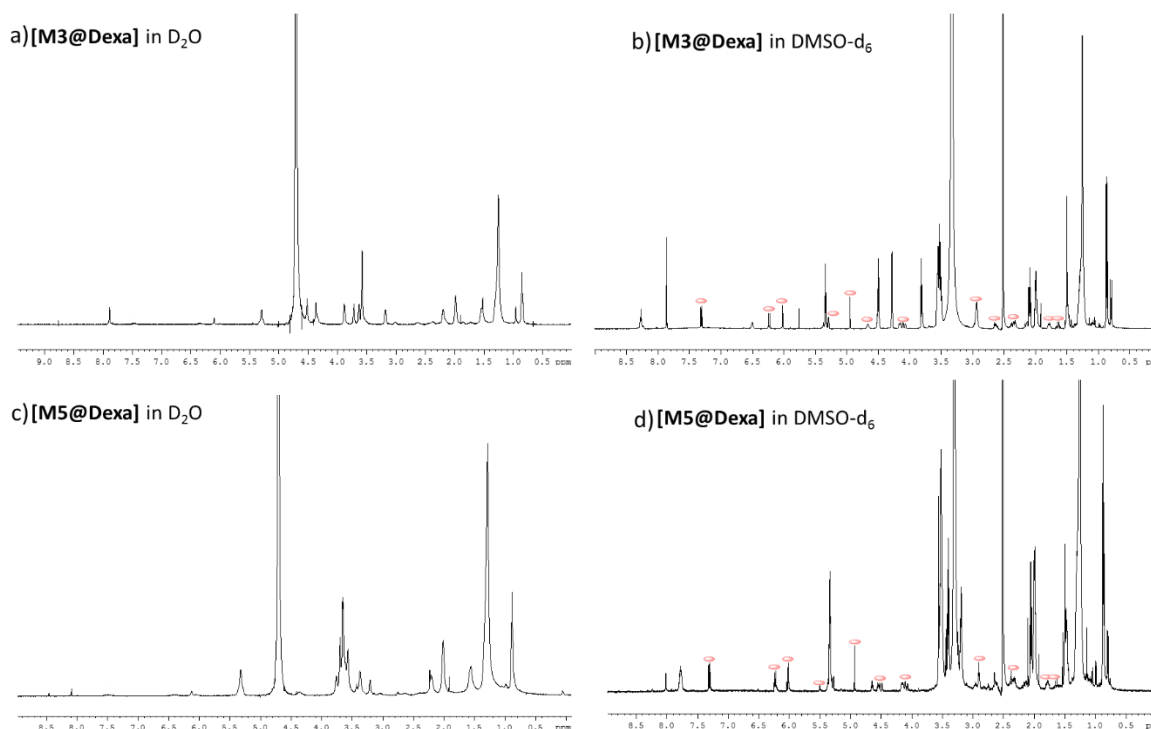

Figure S12.  $^1\text{H}$ -NMR of  $[\text{M3@Dexa}]$  in  $\text{D}_2\text{O}$  (a) and in  $\text{DMSO-d}_6$  (b).  $^1\text{H}$ -NMR of  $[\text{M5@Dexa}]$  in  $\text{D}_2\text{O}$  (c) and in  $\text{DMSO-d}_6$  (d). In pink are indicated the new signals that appear in  $\text{DMSO-d}_6$  ((b) and (d)) corresponding to dexamethasone.

### CMC Curve of Compounds 3 and 5

CMC values were determined using pyrene as an extrinsic fluorescence probe. The pyrene concentration was maintained constant ( $0.6 \cdot 10^{-6} \text{ M}$  in THF), and the concentration of **3** or **5** was varied from  $10^{-3} \text{ M}$  to  $10^{-6}$ . Fluorescence measurements were carried out at  $25^\circ \text{C}$  using a Varian Cary Eclipse spectrofluorometer. At the fixed excitation wavelength of 334 nm, the emission spectra were scanned from 300 to 350 nm. The fluorescence intensity ratios of pyrene at 339 and 335 nm ( $I_{339}/I_{335}$ ,  $I_1/I_3$ ) were calculated and plotted against the concentration logarithm of the amphiphilic compound. The CMC value was determined from the intersection of the two tangent lines.

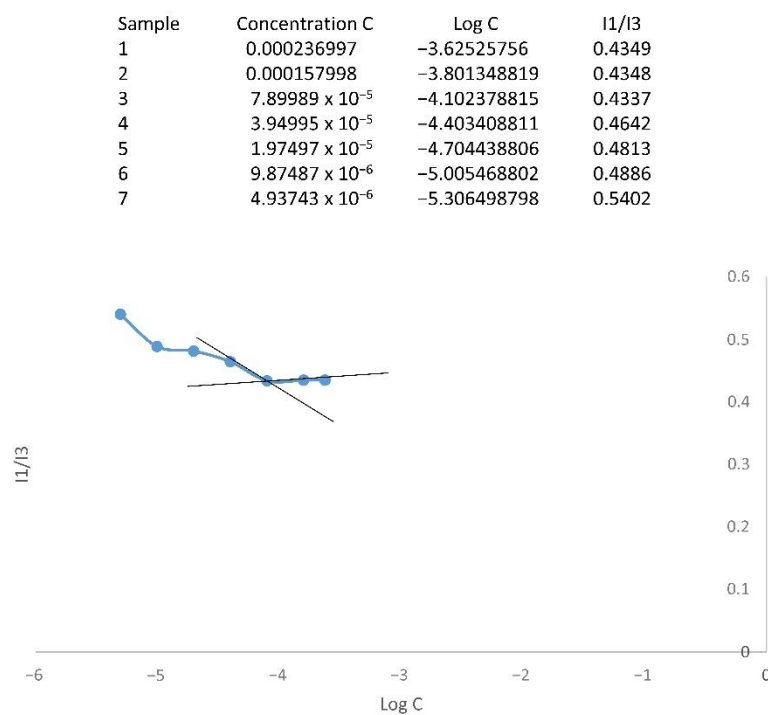

Figure S13. CMC curve of Compound 3.

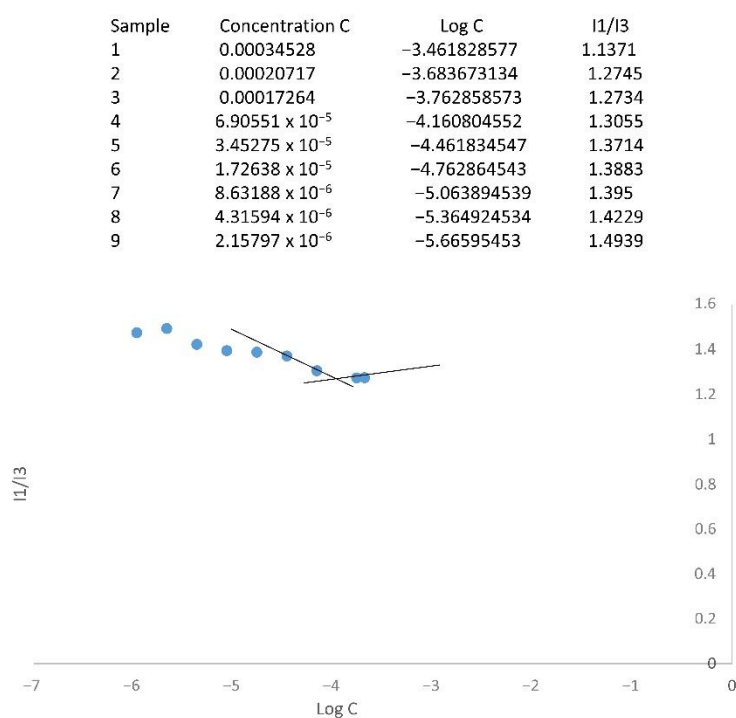

Figure S14. CMC curve of Compound 5.

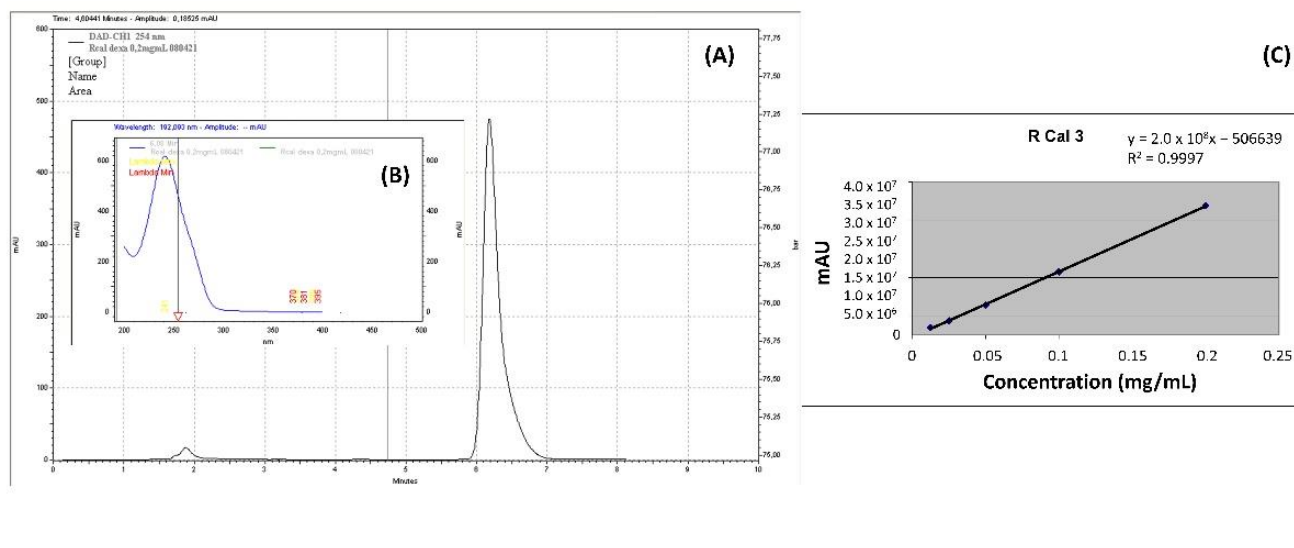

**Figure S15.** (A) HPLC chromatogram of Dexa, (B) UV absorption spectrum of Dexa, and (C) Calibration curve of Dexa.

#### Release Procedure of Dexa from M3@Dexa and M5@Dexa

M3@Dexa or M5@Dexa (2 mg) were transferred into a dialysis bag containing 4 ml of milliQ water at pH 7.4. The bag was closed at both ends with plastic clamps and tested for leakage. This bag was then placed into 300 mL of milliQ water at pH 7.4 and gently stirred for 52 h at room temperature. The bag was fully immersed under the surface of the liquid. Aliquots of about 2 ml were withdrawn from the 300 mL recipient at specified time periods. The withdrawn aliquots were replaced with equal volumes of milliQ water. Aliquots were then filtered using a 45 µm syringe filter. Aliquots were analyzed using HPLC.

#### Stability Study of Micelles in Water vs. Time

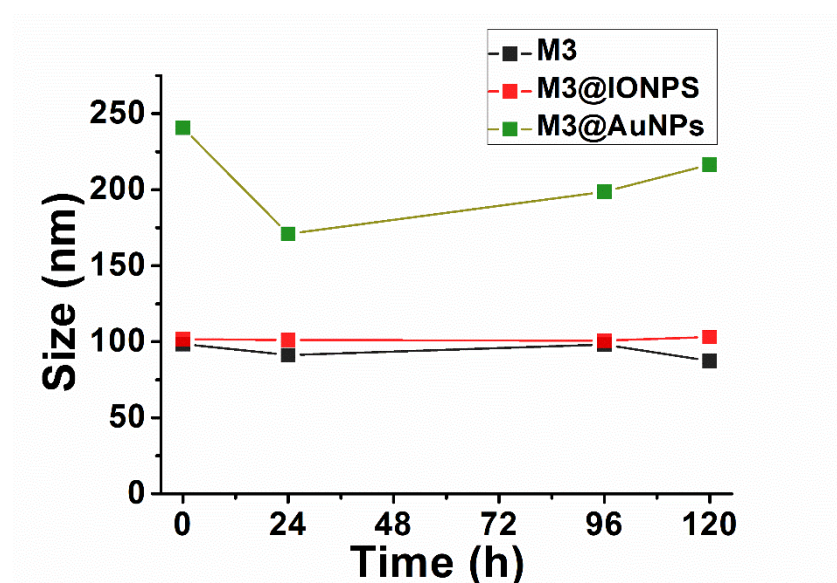

**Figure S16.** Hydrodynamic sizes of micelles M3, M3@IONPs and M3@AuNPs in water vs. time.
